# Supplementary material for: A Novel Clinical Nomogram for Predicting Overall Survival in Patients with Emergency Surgery for Colorectal Cancer
Source: MDPI journal article supplement (doi:10.3390/jpm13040575), 2023-03-24
Supplement: s1 [file s1]

## Supplementary material

Explanatory data included ROC curve figures for age, NLR, PLR, LMR, PNI, Charlson score, age-adjusted Charlson score, calibration plots for 1-year overall survival, 3-years overall survival, 5-years overall survival years and nomogram for predicting overall survival using pTNM.

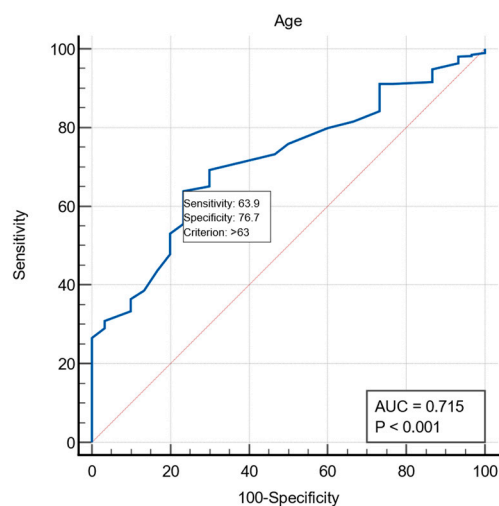

**Supplementary Figure S1.** ROC curve and cut-off value for age.

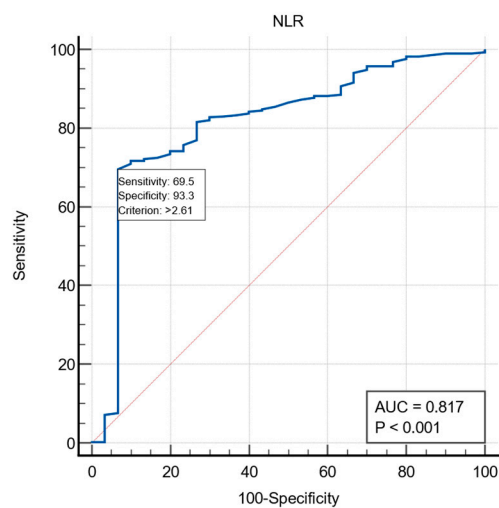

**Supplementary Figure S2.** ROC curve and cut-off value for NLR.

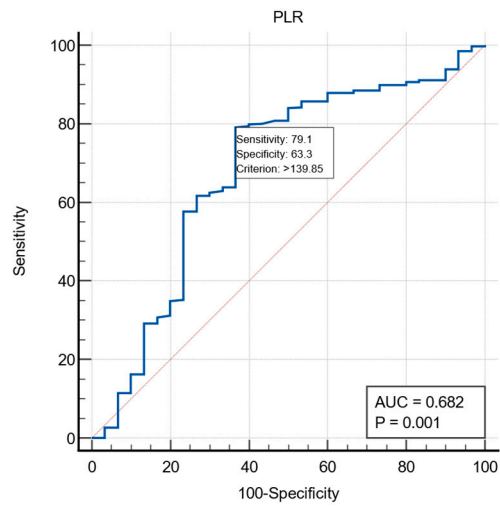

**Supplementary Figure S3.** ROC curve and cut-off value for PLR.

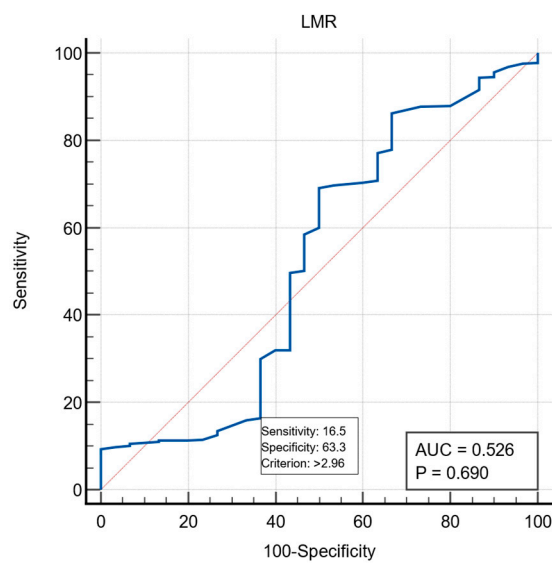

**Supplementary Figure S4.** ROC curve and cut-off value for LMR.

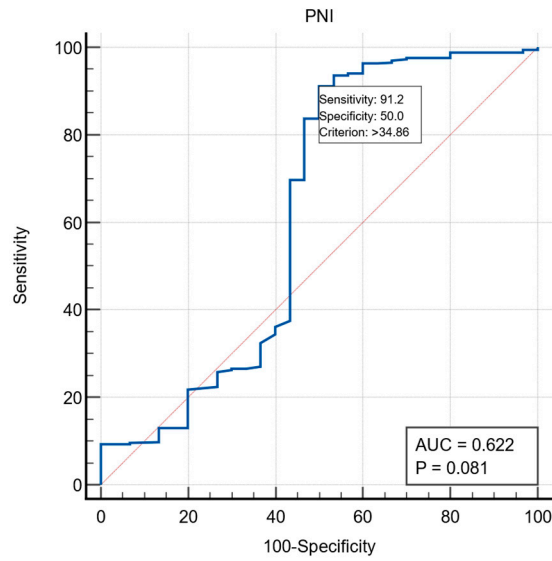

**Supplementary Figure S5.** ROC curve and cut-off value for PNI.

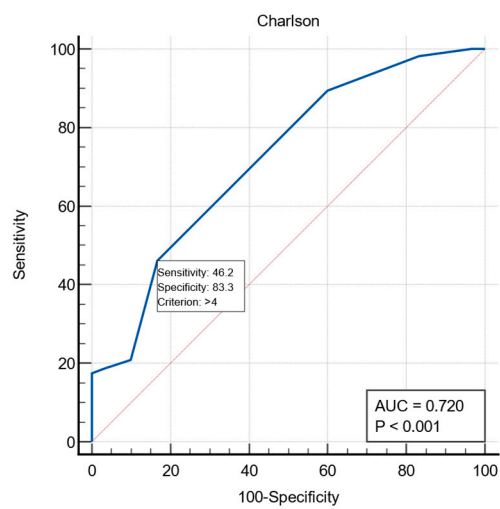

**Supplementary Figure S6.** ROC curve and cut-off value for Charlson score.

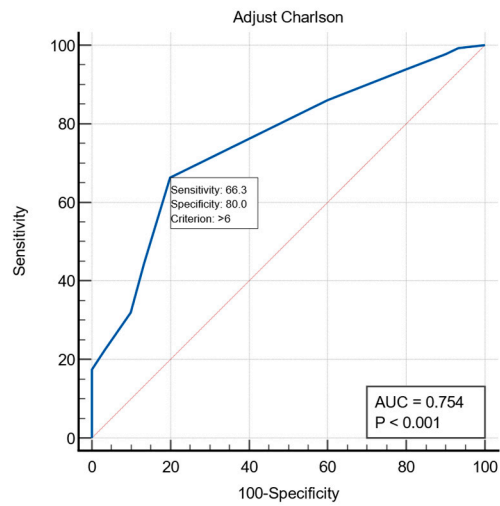

**Supplementary Figure S7.** ROC curve and cut-off value for age-adjusted Charlson score.

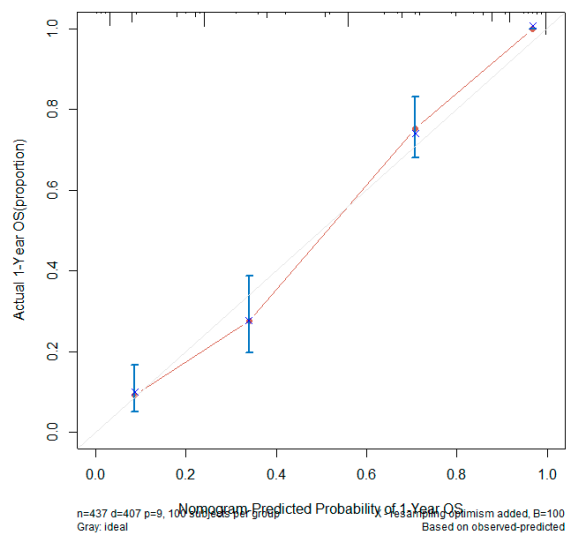

**Supplementary Figure S8.** 1-year overall survival nomogram calibration plot.

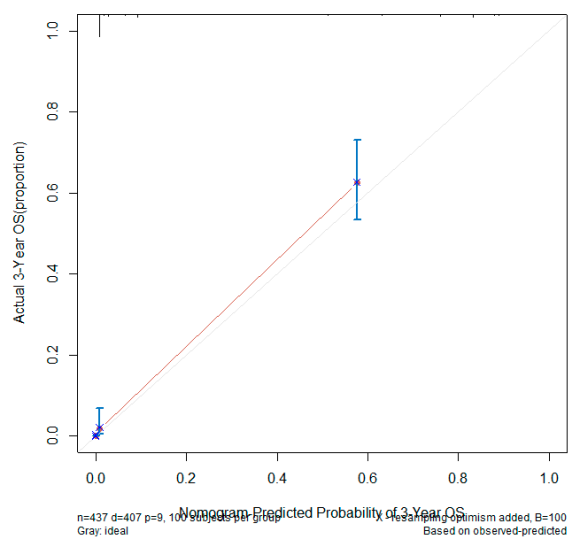

**Supplementary Figure S9.** 3-years overall survival nomogram calibration plot.

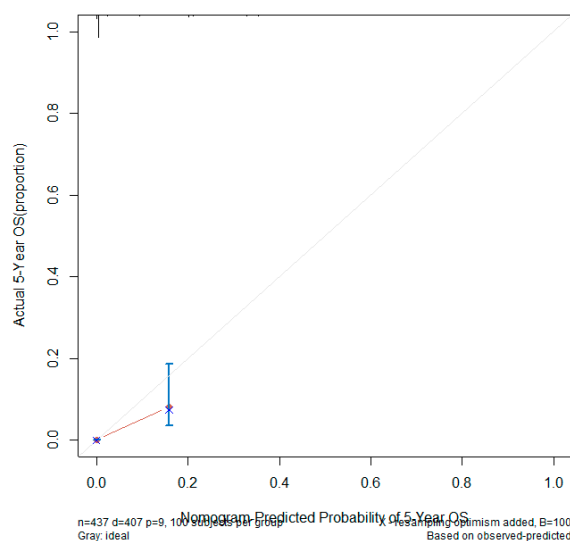

**Supplementary Figure S10.** 5-years overall survival nomogram calibration plot.

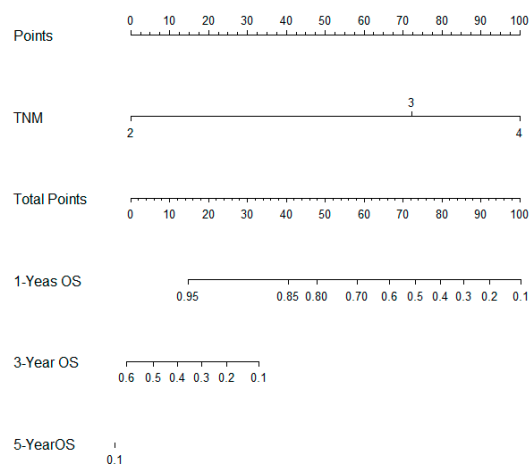

**Supplementary Figure S11.** Nomogram for predicting overall survival using pTNM
